# Supplementary material for: Survival, differentiation, and migration of high-purity mouse embryonic stem cell-derived progenitor motor neurons in fibrin scaffolds after sub-acute spinal cord injury
Source: Royal Society of Chemistry journal article supplement (doi:10.1039/c4bm00106k), 2014-01-01
Supplement: c4bm00106k1.pdf [file c4bm00106k1.pdf]

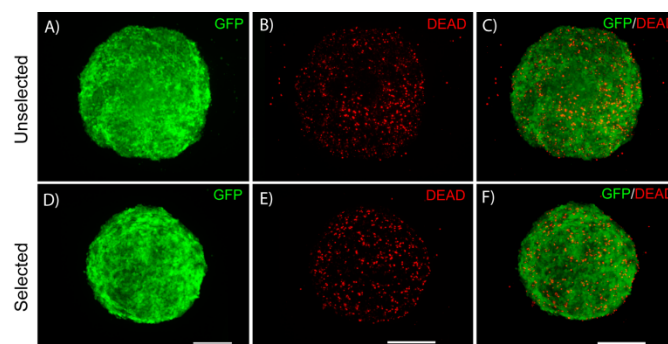

**Supp. Figure 1** Ethidium homodimer labeling of dead cells in embryoid bodies following the  $2/4^+$  induction. A) GFP expression in an embryoid body from unselected cultures. B) Corresponding ethidium homodimer staining in the embryoid body shown in (A). C) Merge view of GFP and ethidium homodimer. D) GFP expression in an embryoid body from unselected cultures. E) Corresponding ethidium homodimer staining in the embryoid body shown in (D). F) Merge view of GFP and ethidium homodimer. Scale Bar = 250  $\mu$ M.

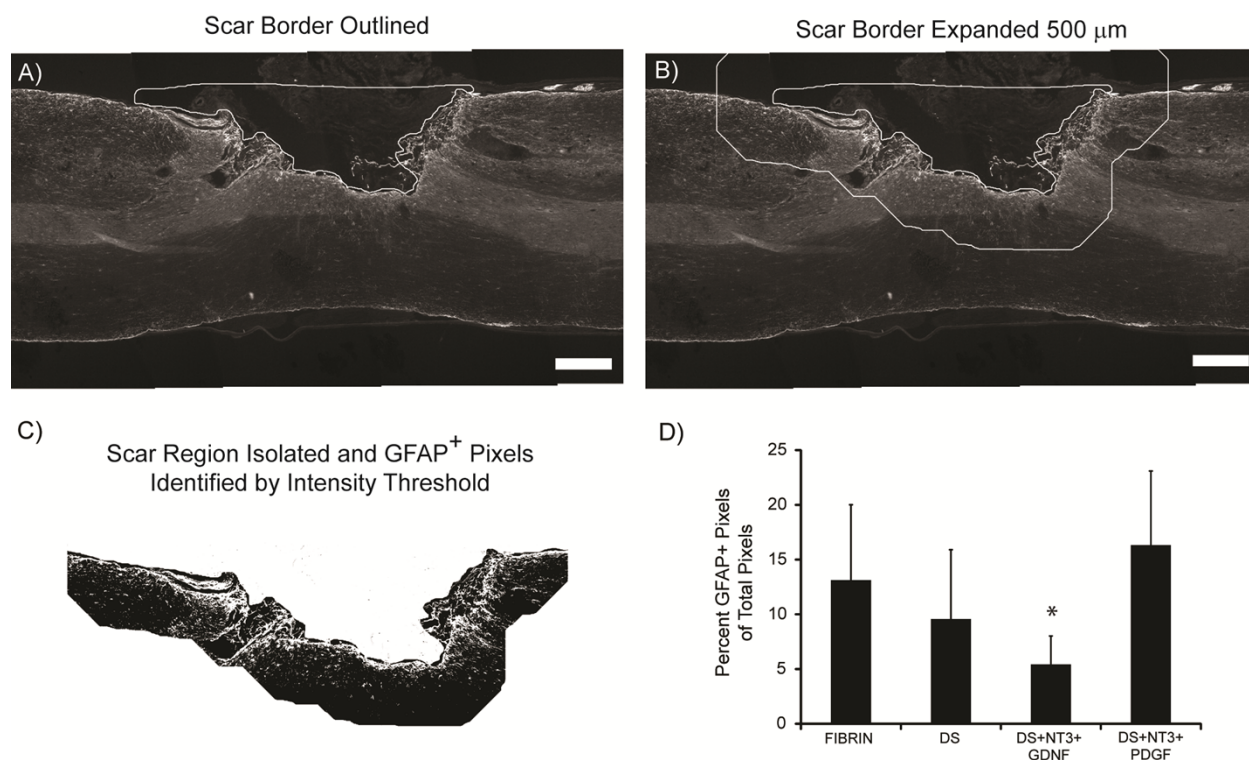

**Supp. Figure 2** Quantification of glial scarring adjacent to the injury site. A) Compiled overview of GFAP staining with the lesion border outlined. B) Expansion of the lesion border 500  $\mu\text{m}$  into the spinal cord tissue. C) Intensity threshold of GFAP staining within the first 500  $\mu\text{m}$  of tissue adjacent to the injury site. D) Average percent of pixels labeling for GFAP within the selected region for each group. \* indicates  $p < 0.05$  compared to the DS+NT3+PDGF group. Scale Bar = 500  $\mu\text{m}$ .

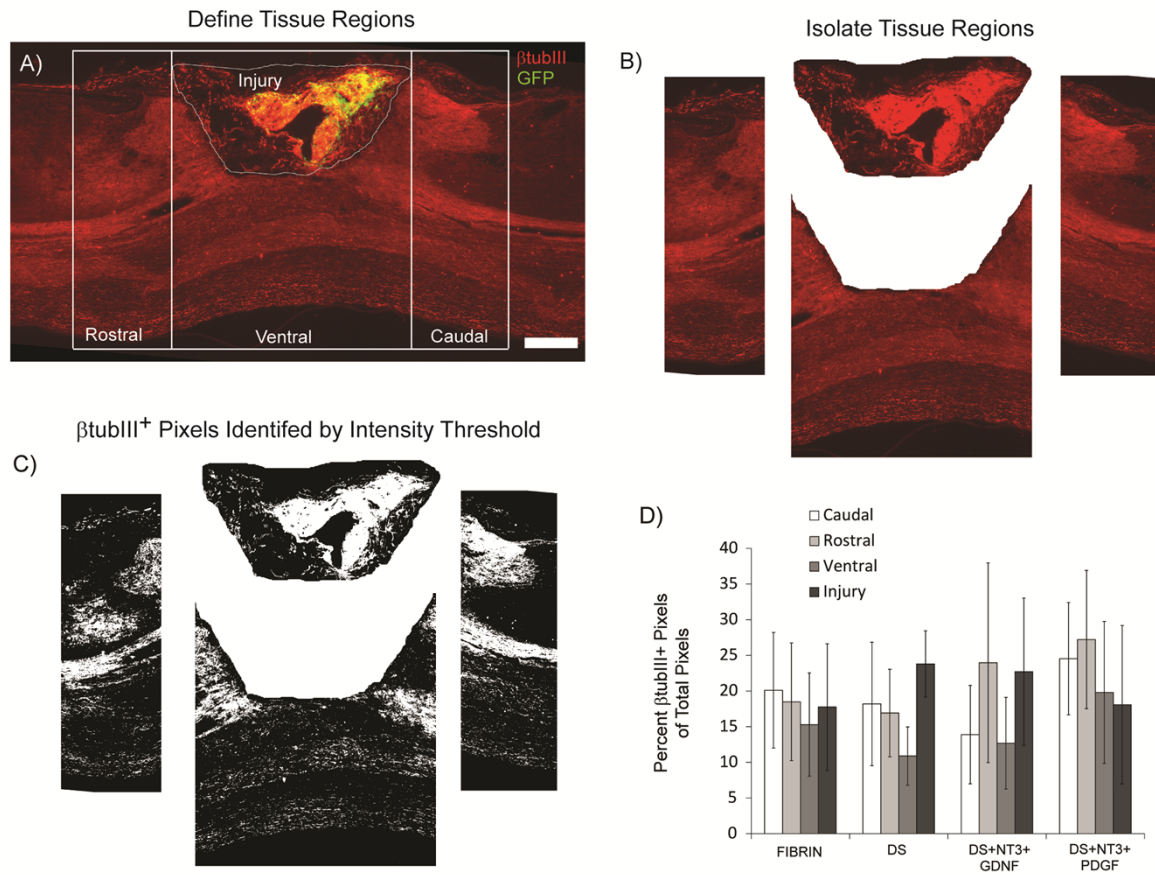

**Supp. Figure 3** Quantification of  $\beta$ tubIII staining surrounding the injury site. A) Compiled overview showing  $\beta$ tubIII staining and GFP fluorescence with individual regions outlined for analysis (injury, ventral, rostral, and caudal). B) Isolation of each individual region. C) Intensity threshold of  $\beta$ tubIII staining within defined regions. D) Average percent of pixels labeling for  $\beta$ tubIII within each region for each group. Scale Bar = 500  $\mu$ M.

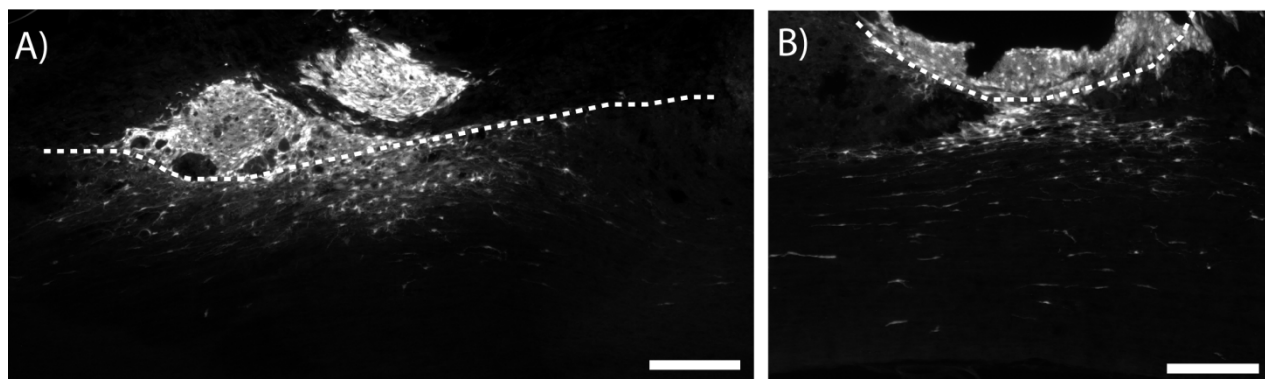

**Supp. Figure 4** Migration and axon extension from transplanted cells at two weeks post-transplantation. Compiled overview showing migration of cells across the host-graft interface (dotted white line) into the host gray matter in sections from the A) Fibrin and B) DS+NT3+PDGF groups. Scale Bar = 250  $\mu$ M.

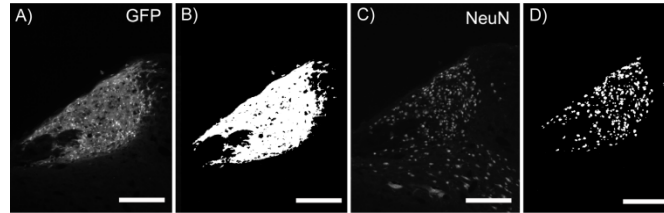

**Supp. Figure 5** Quantitative analysis GFP expression and differentiation marker labeling. A) GFP expression in transplanted cells. B) Pixels above the fluorescent intensity threshold are shown in white, while pixels with low intensity are black. C) NeuN labeling in the cell transplant shown in (A). D) Pixels that correspond to the GFP-positive areas selected in (B) and are above the threshold intensity for the appropriate differentiation marker are shown in white. Only the pixels shown in (D) are quantified for differentiation marker analysis. Scale Bar = 250  $\mu$ M.
